# Supplementary material for: CD8+ Lymphocyte Infiltration is a Specific Feature of Colitis Induced By Immune Checkpoint Inhibitors
Source: Research Square preprint supplement (doi:10.21203/rs.3.rs-1019712/v1), 2021-11-09
Supplement: Supplementary file 1 [file 5198f546fcec4e56a861dfe5.docx]

| **Supplementary table 1** Clinical features of patients |  |  |  |  |  |
| --- | --- | --- | --- | --- | --- |
|  | **irAEs (n=12)** | **UC (n=37)** | **CD**  **(n=22)** | **IC**  **(n=31)** | ***p*‐value** |
| Age (years) |  |  |  |  | < 0.01 |
| Median | 67 | 41 | 30 | 72 |  |
| Range | 57-82 | 16-76 | 15-72 | 34-92 |  |
| Sex (cases) |  |  |  |  | 0.199 |
| Male | 9 | 27 | 12 | 16 |  |
| Female | 3 | 10 | 10 | 15 |  |
| Radiographic signs of gastrointestinal inflammation (cases) |  |  |  |  | < 0.01 |
| Enterocolitis | 8 | 5 | 12 | 8 |  |
| No enterocolitis | 4 | 9 | 5 | 13 |  |
| Not examined | 0 | 23 | 5 | 10 |  |
| CD toxin (cases) |  |  |  |  | < 0.01 |
| Positive | 0 | 0 | 0 | 0 |  |
| Negative | 11 | 10 | 14 | 8 |  |
| Not examined | 1 | 27 | 8 | 23 |  |
| Stool culture (cases) |  |  |  |  | < 0.05 |
| Positive | 0 | 4 | 6 | 4 |  |
| Negative | 12 | 24 | 15 | 17 |  |
| Not examined | 0 | 9 | 1 | 10 |  |
| CMV antigenemia (cases) |  |  |  |  | < 0.01 |
| Positive | 1 | 1 | 0 | 0 |  |
| Negative | 8 | 6 | 9 | 1 |  |
| Not examined | 3 | 30 | 13 | 30 |  |

*Abbreviations*: *CD* Crohn's disease, *CD toxin* Clostridioides difficile toxin, *CMV* cytomegalovirus, *IC* ischemic colitis, *irAE* immune-related adverse event, *UC* ulcerative colitis.
